# Supplementary material for: Angiogenic Capacity of Dental Pulp Stem Cell Regulated by SDF-1α-CXCR4 Axis
Source: Hindawi journal article supplement (doi:10.1155/2017/8085462), 2017-01-01
Supplement: f1 [file 8085462.f1.pdf]

Supplementary Figure 1.

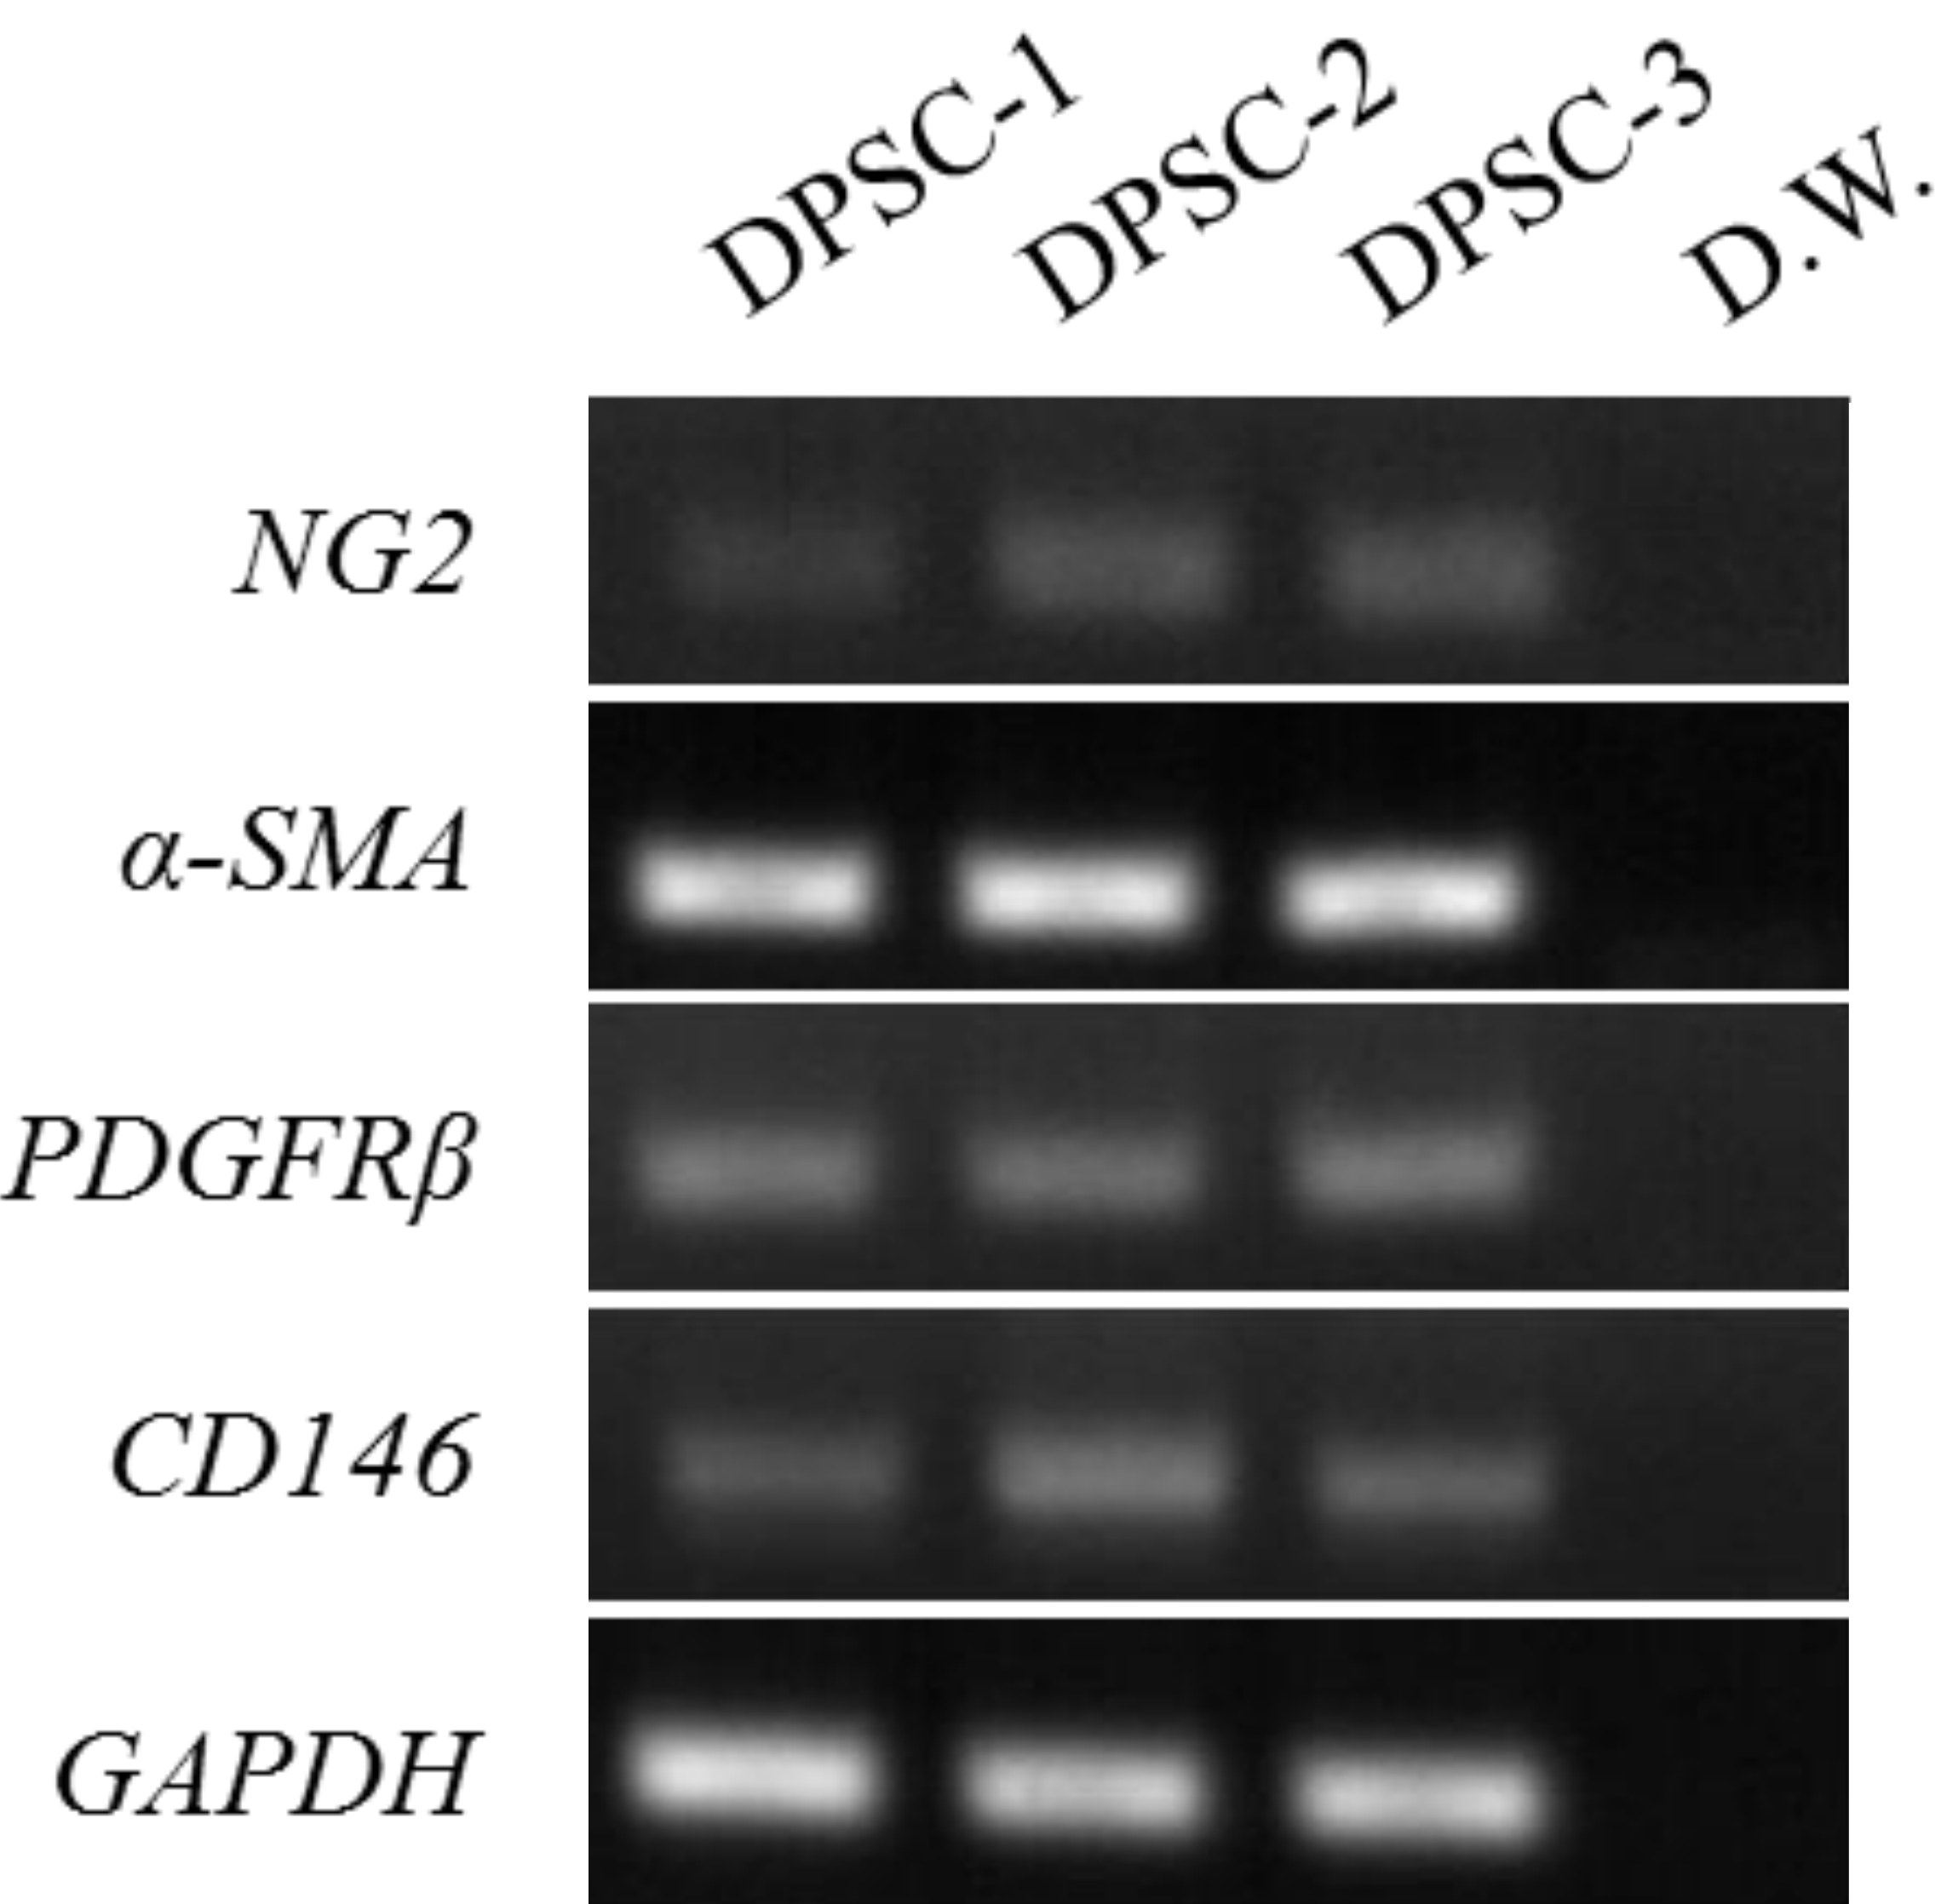



**A**

**No AMD3100**

**DPSC-CM**

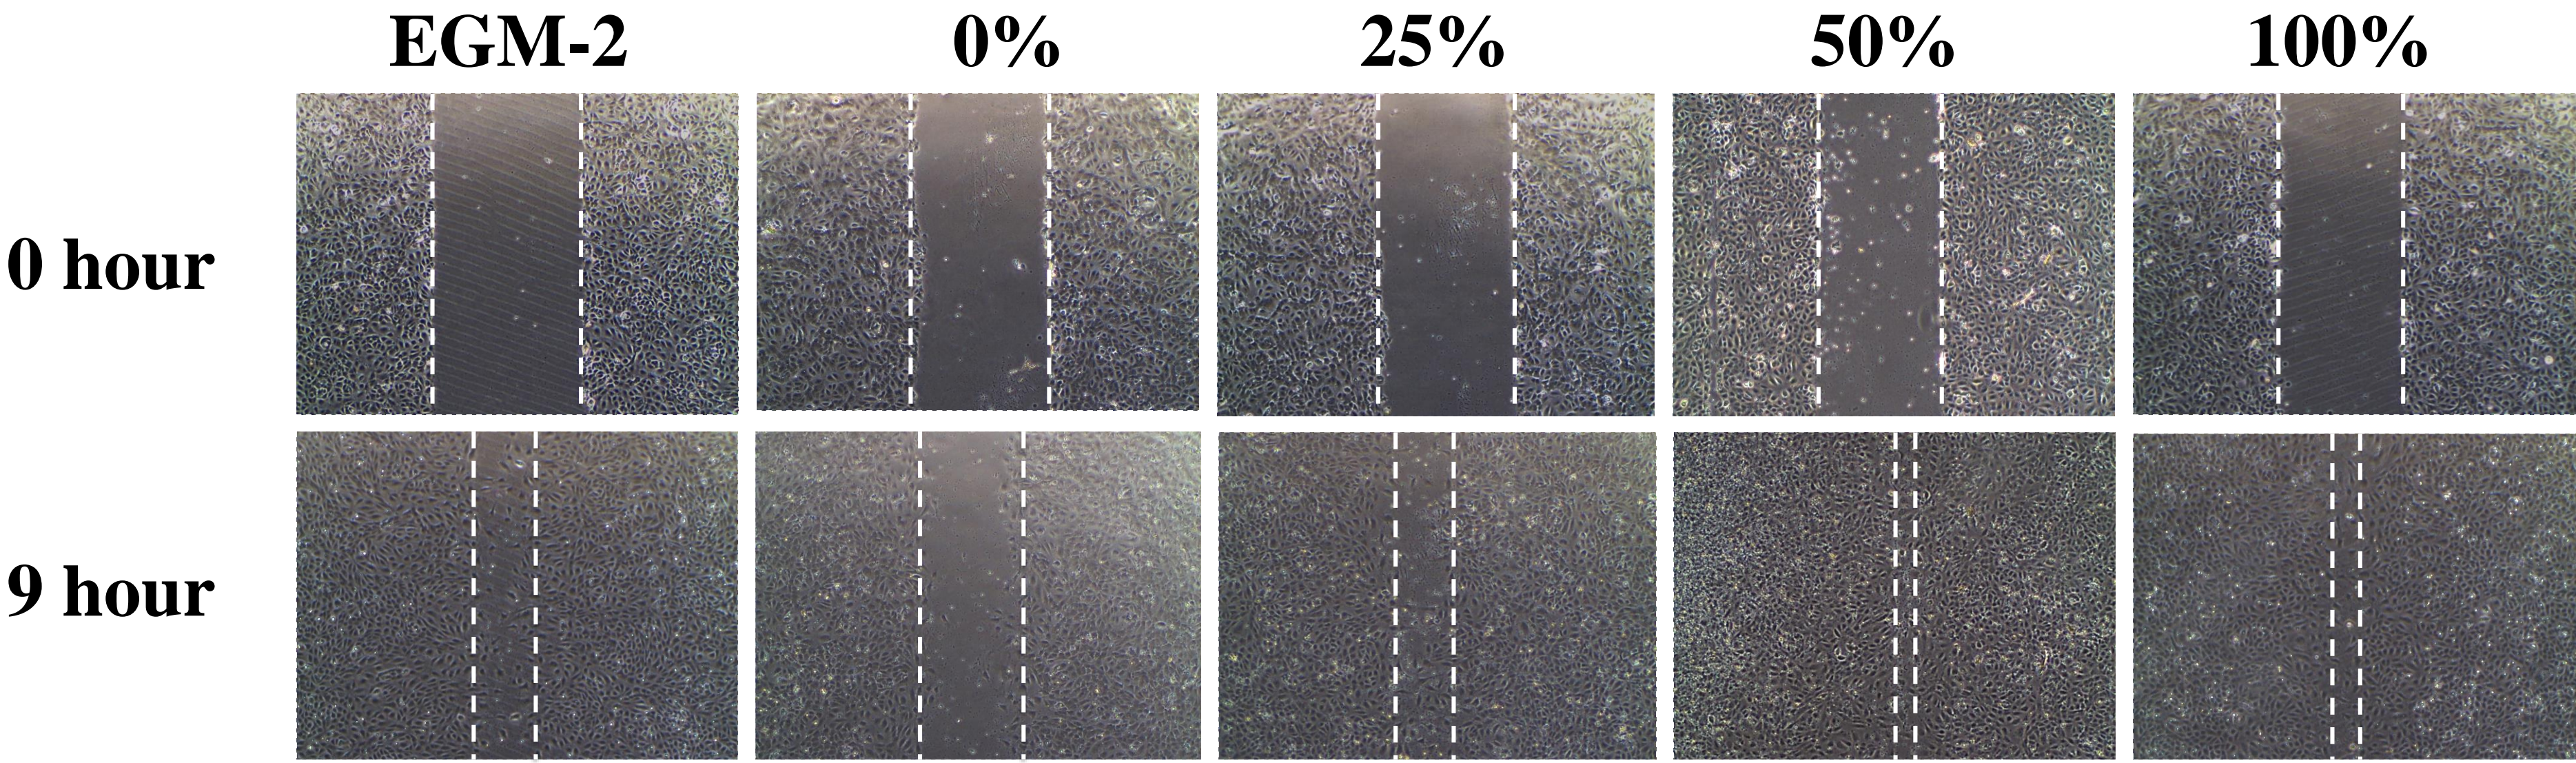

**B**

**10  $\mu$ M AMD3100**

**DPSC-CM**

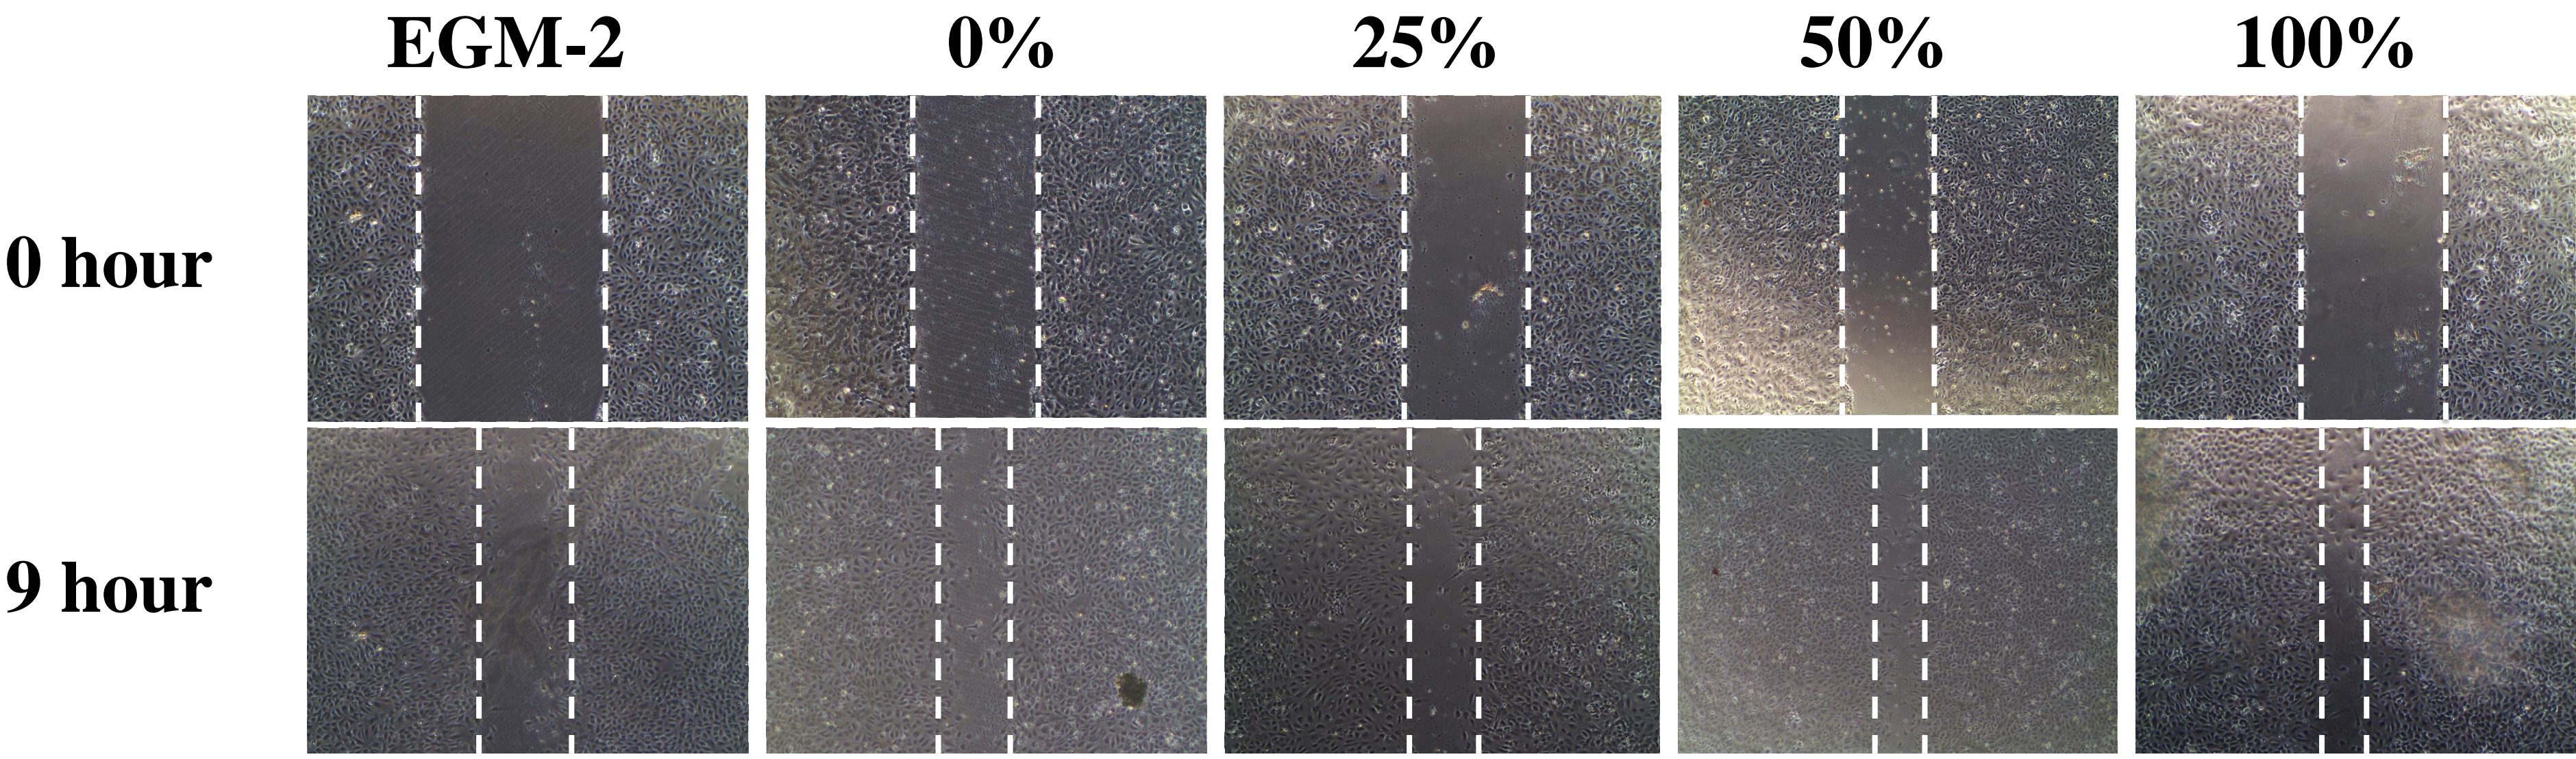

**C**

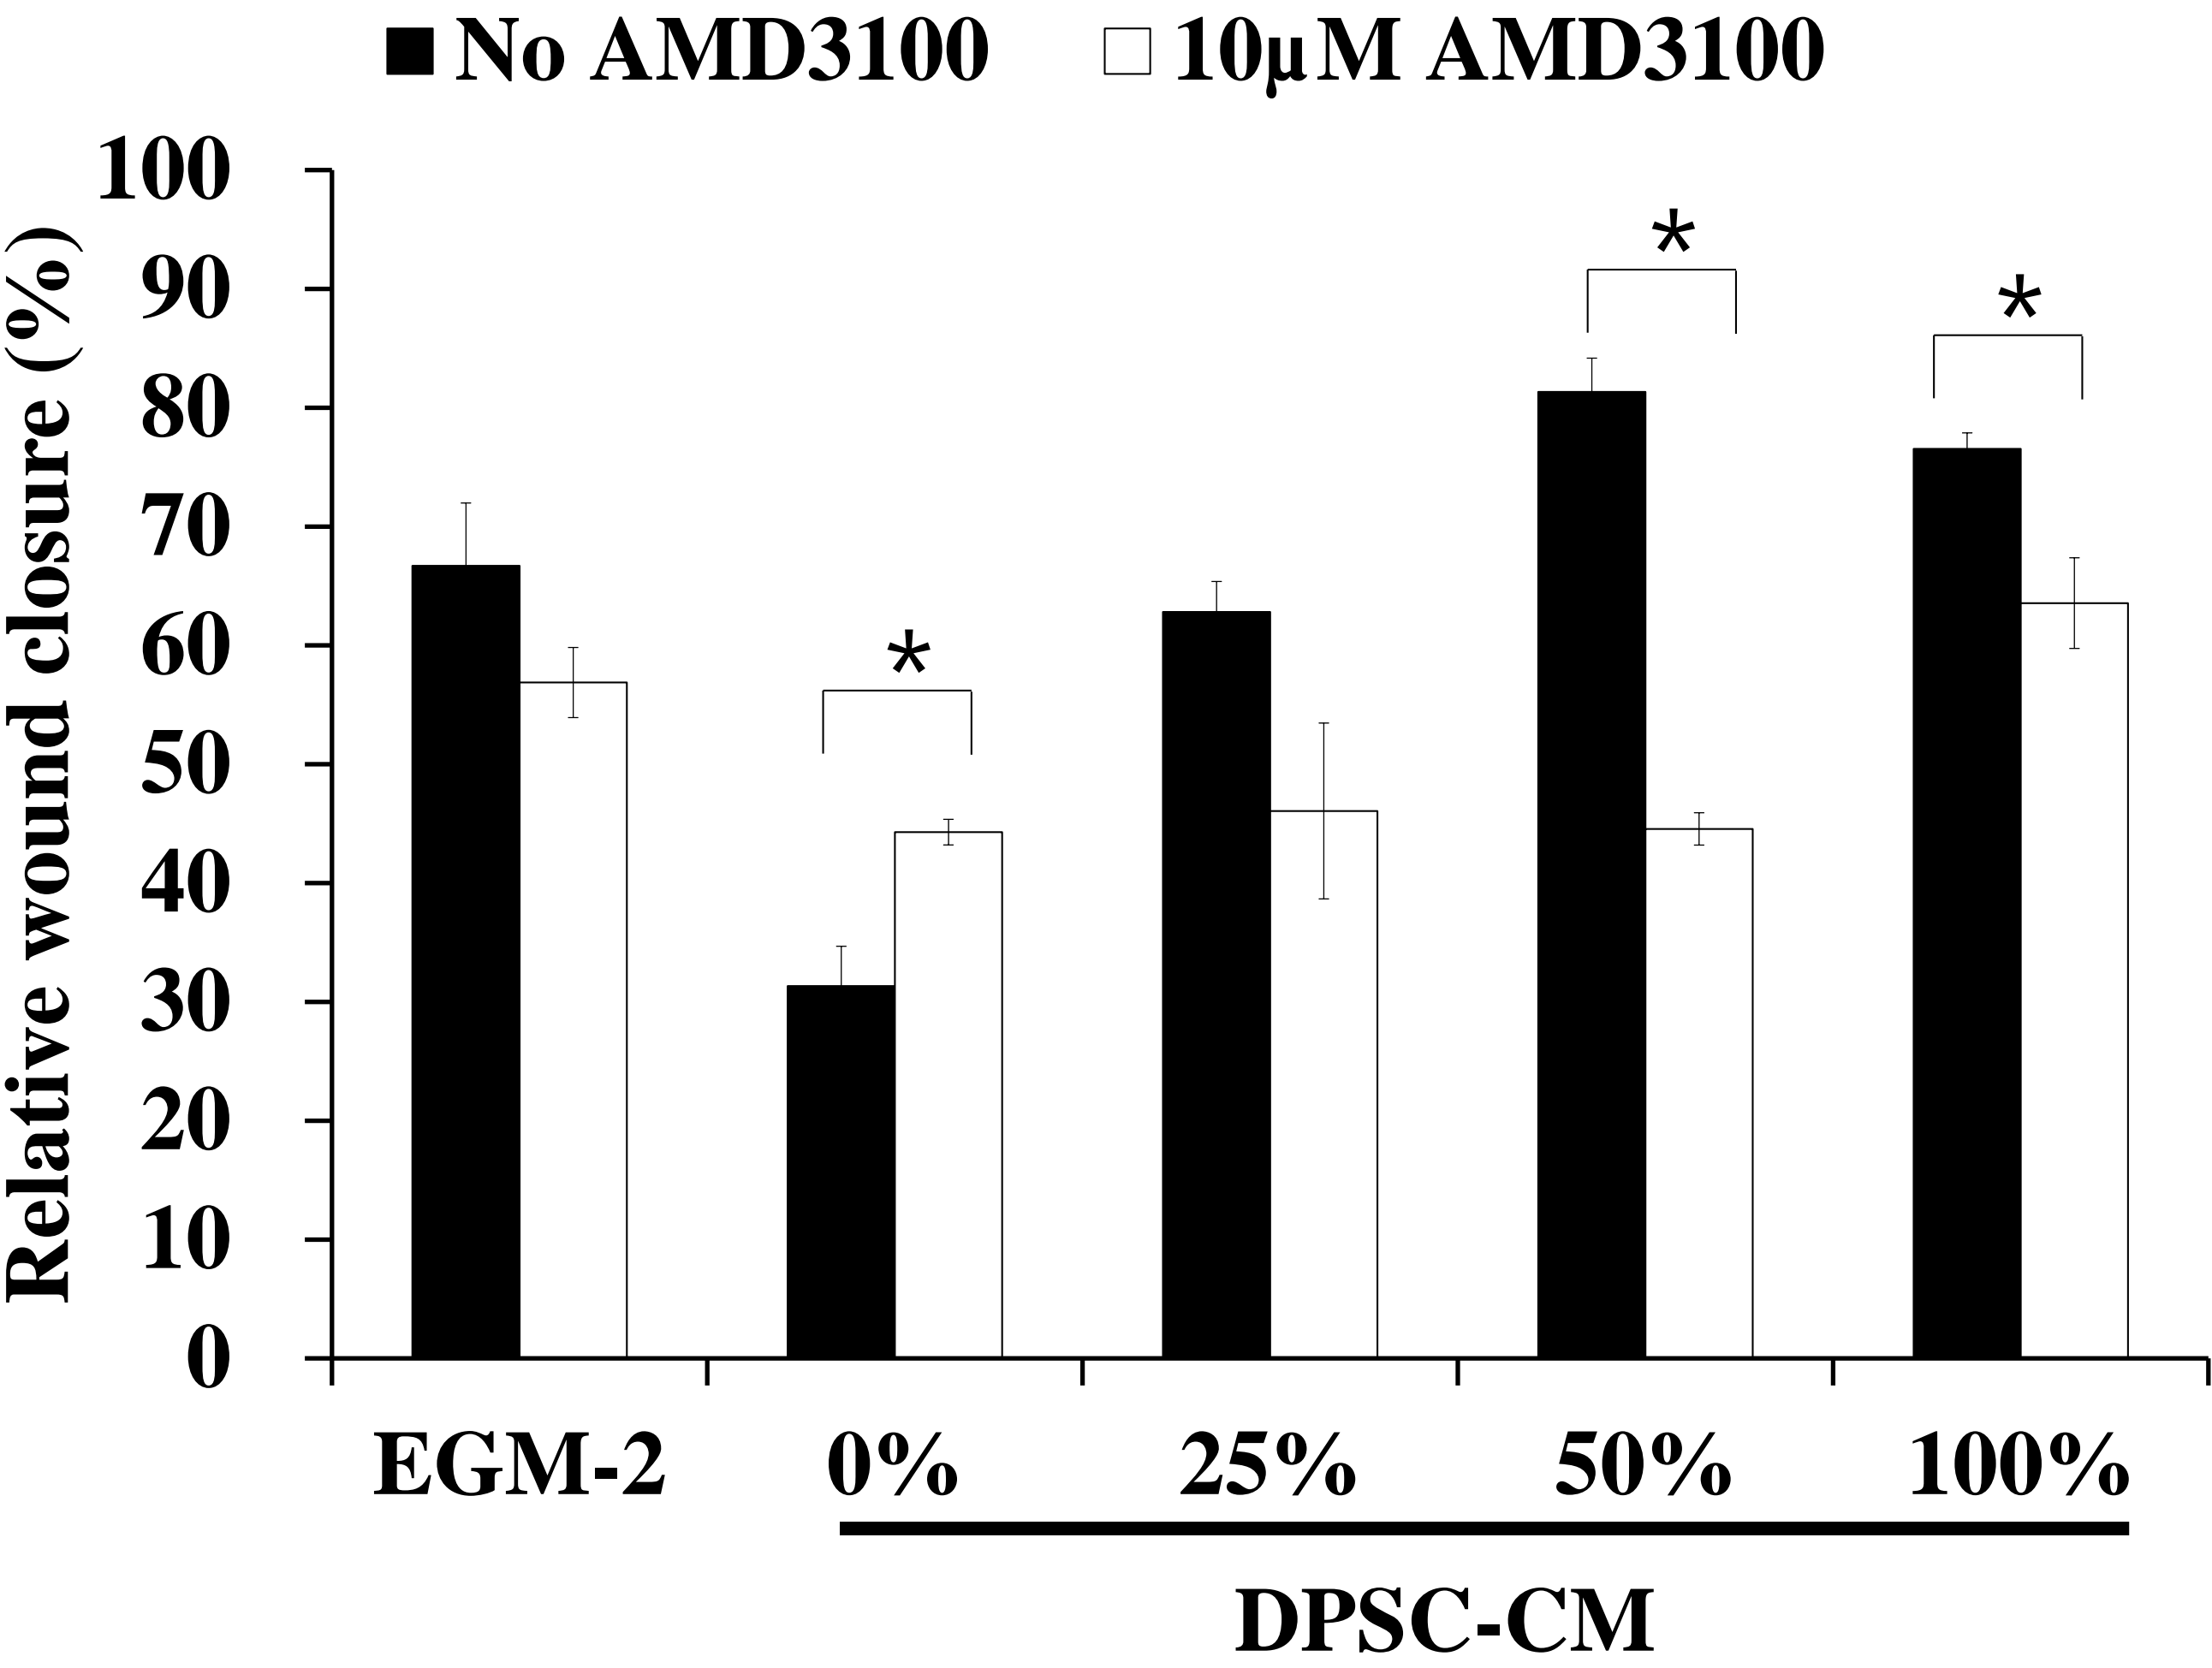



Supplementary Figure 3.

**A**

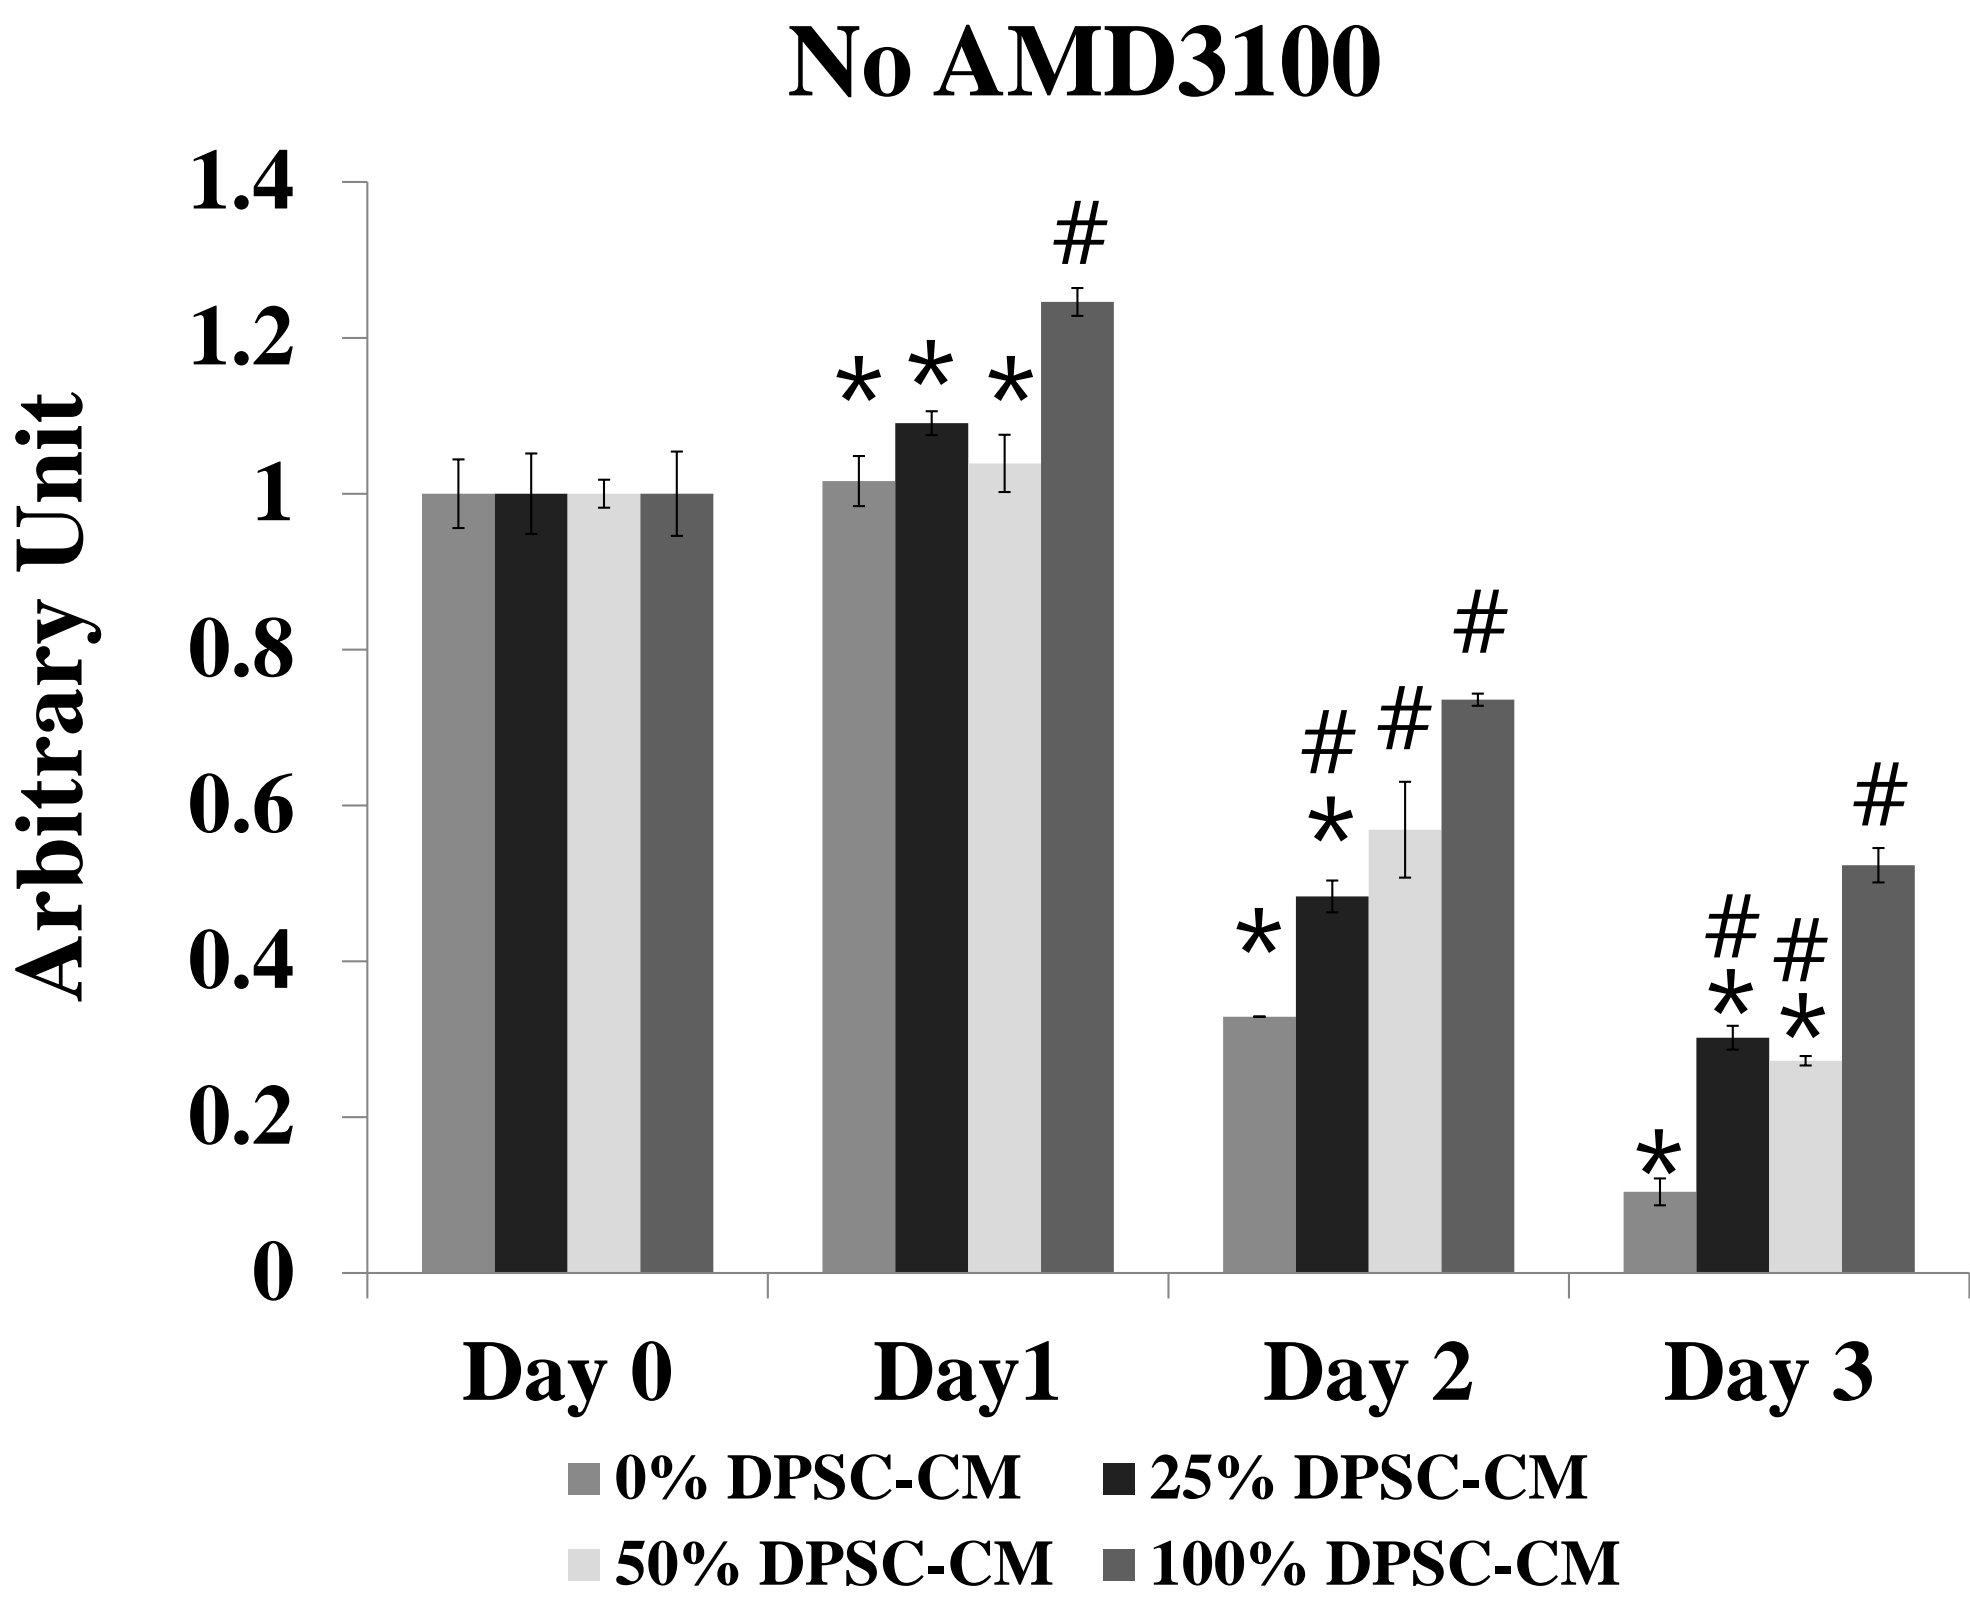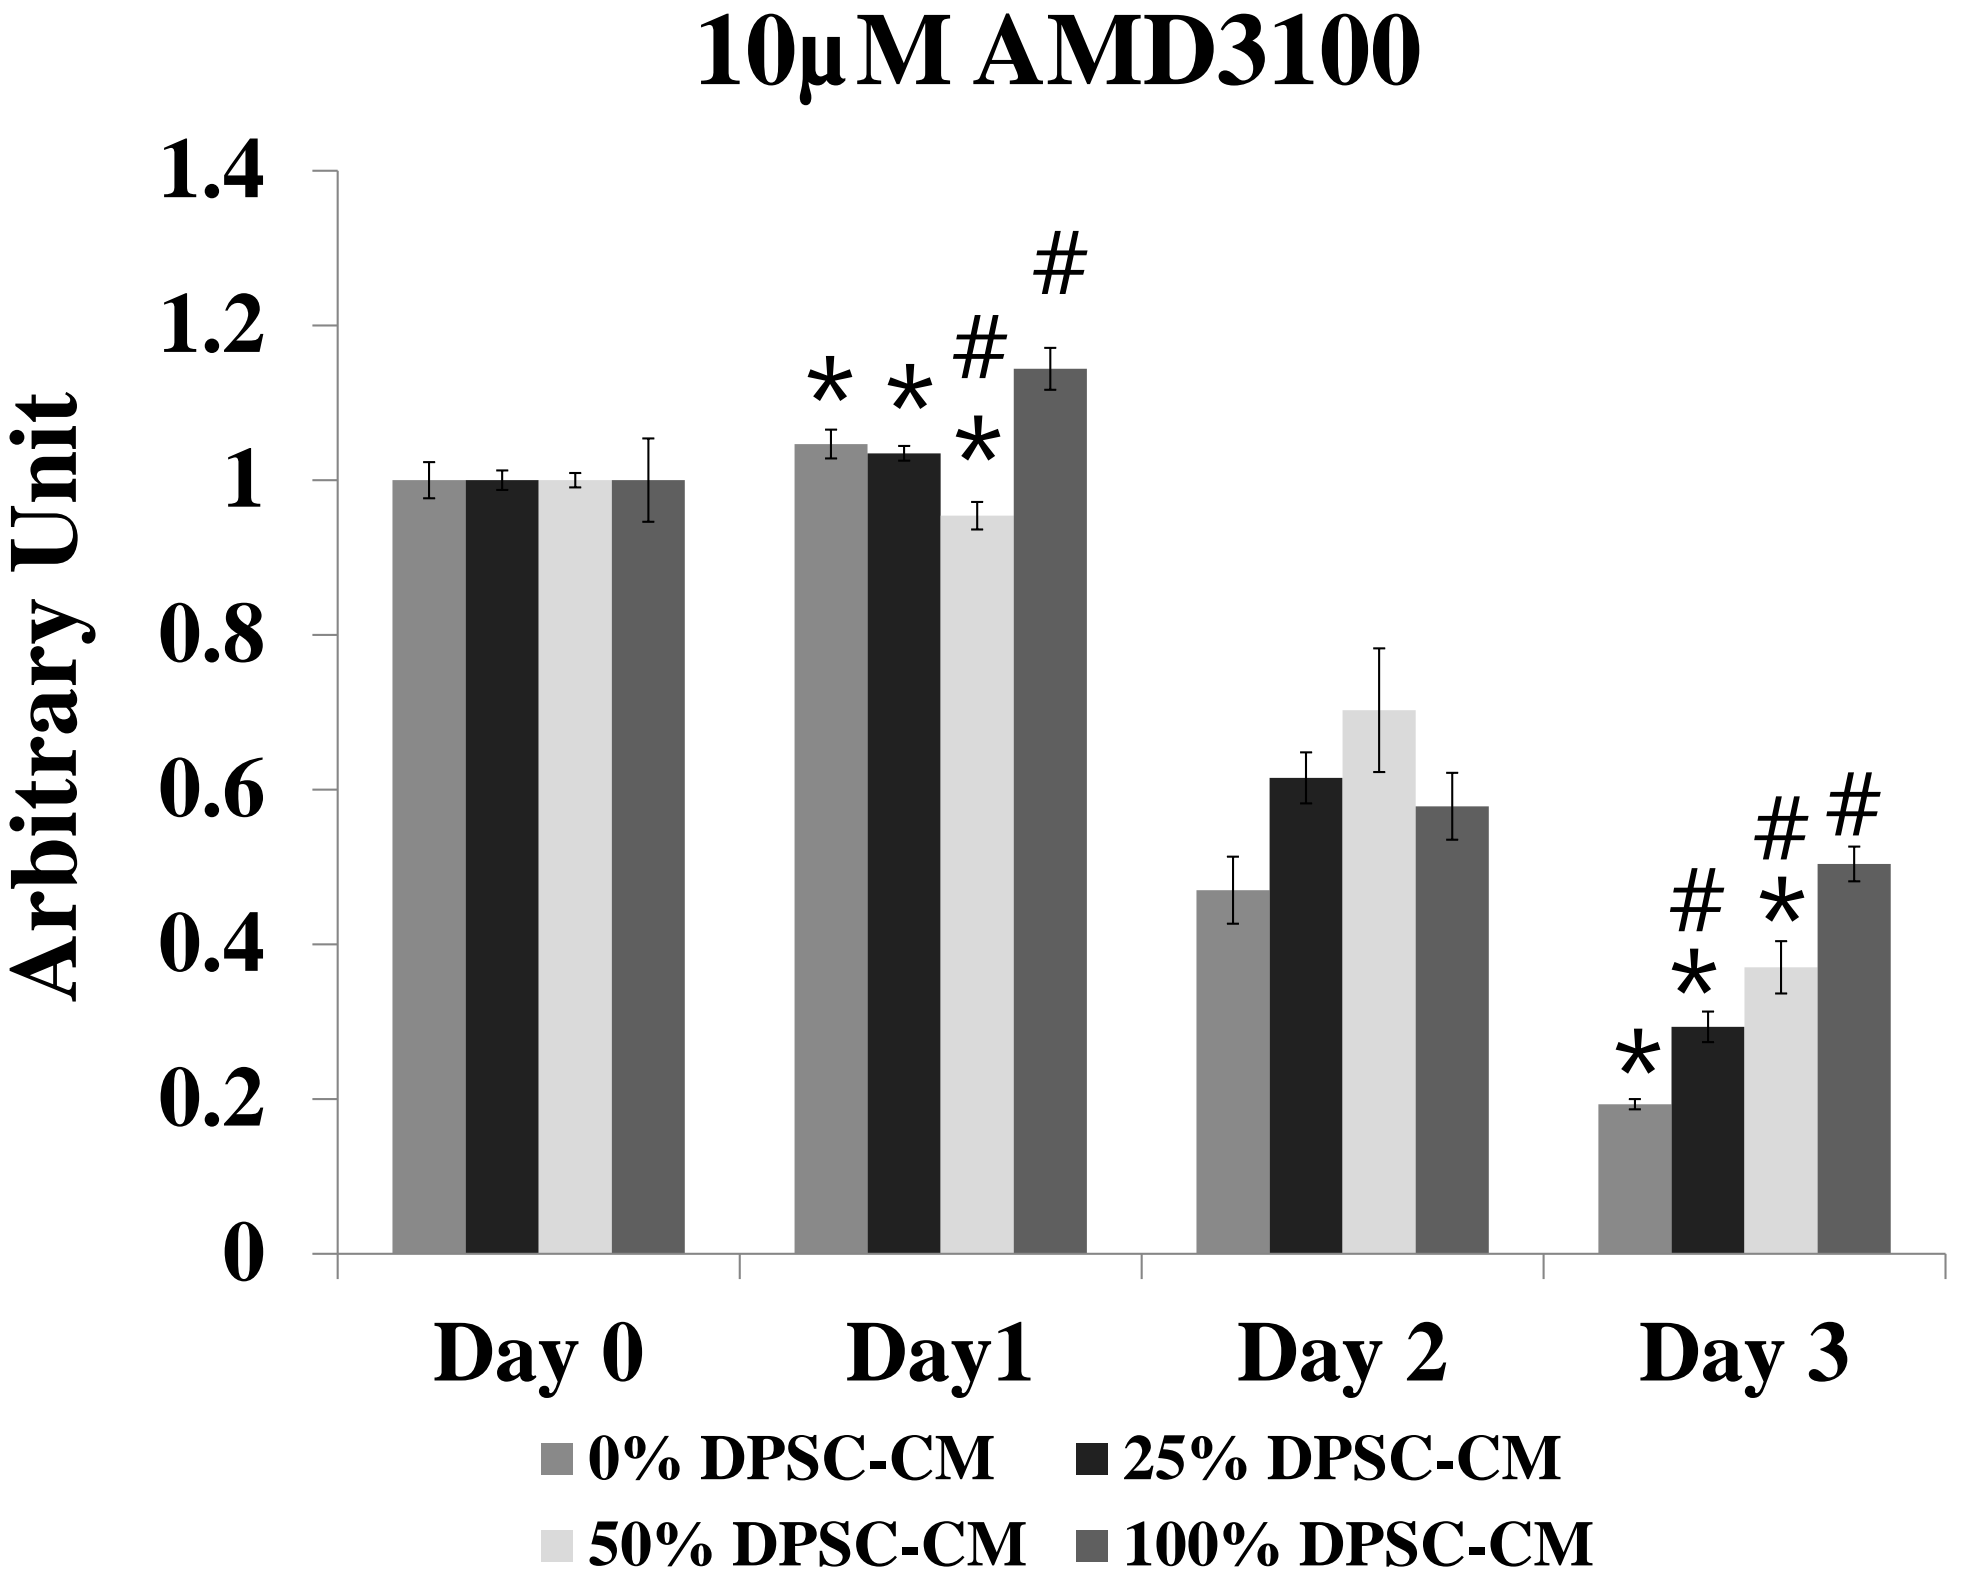

**B**

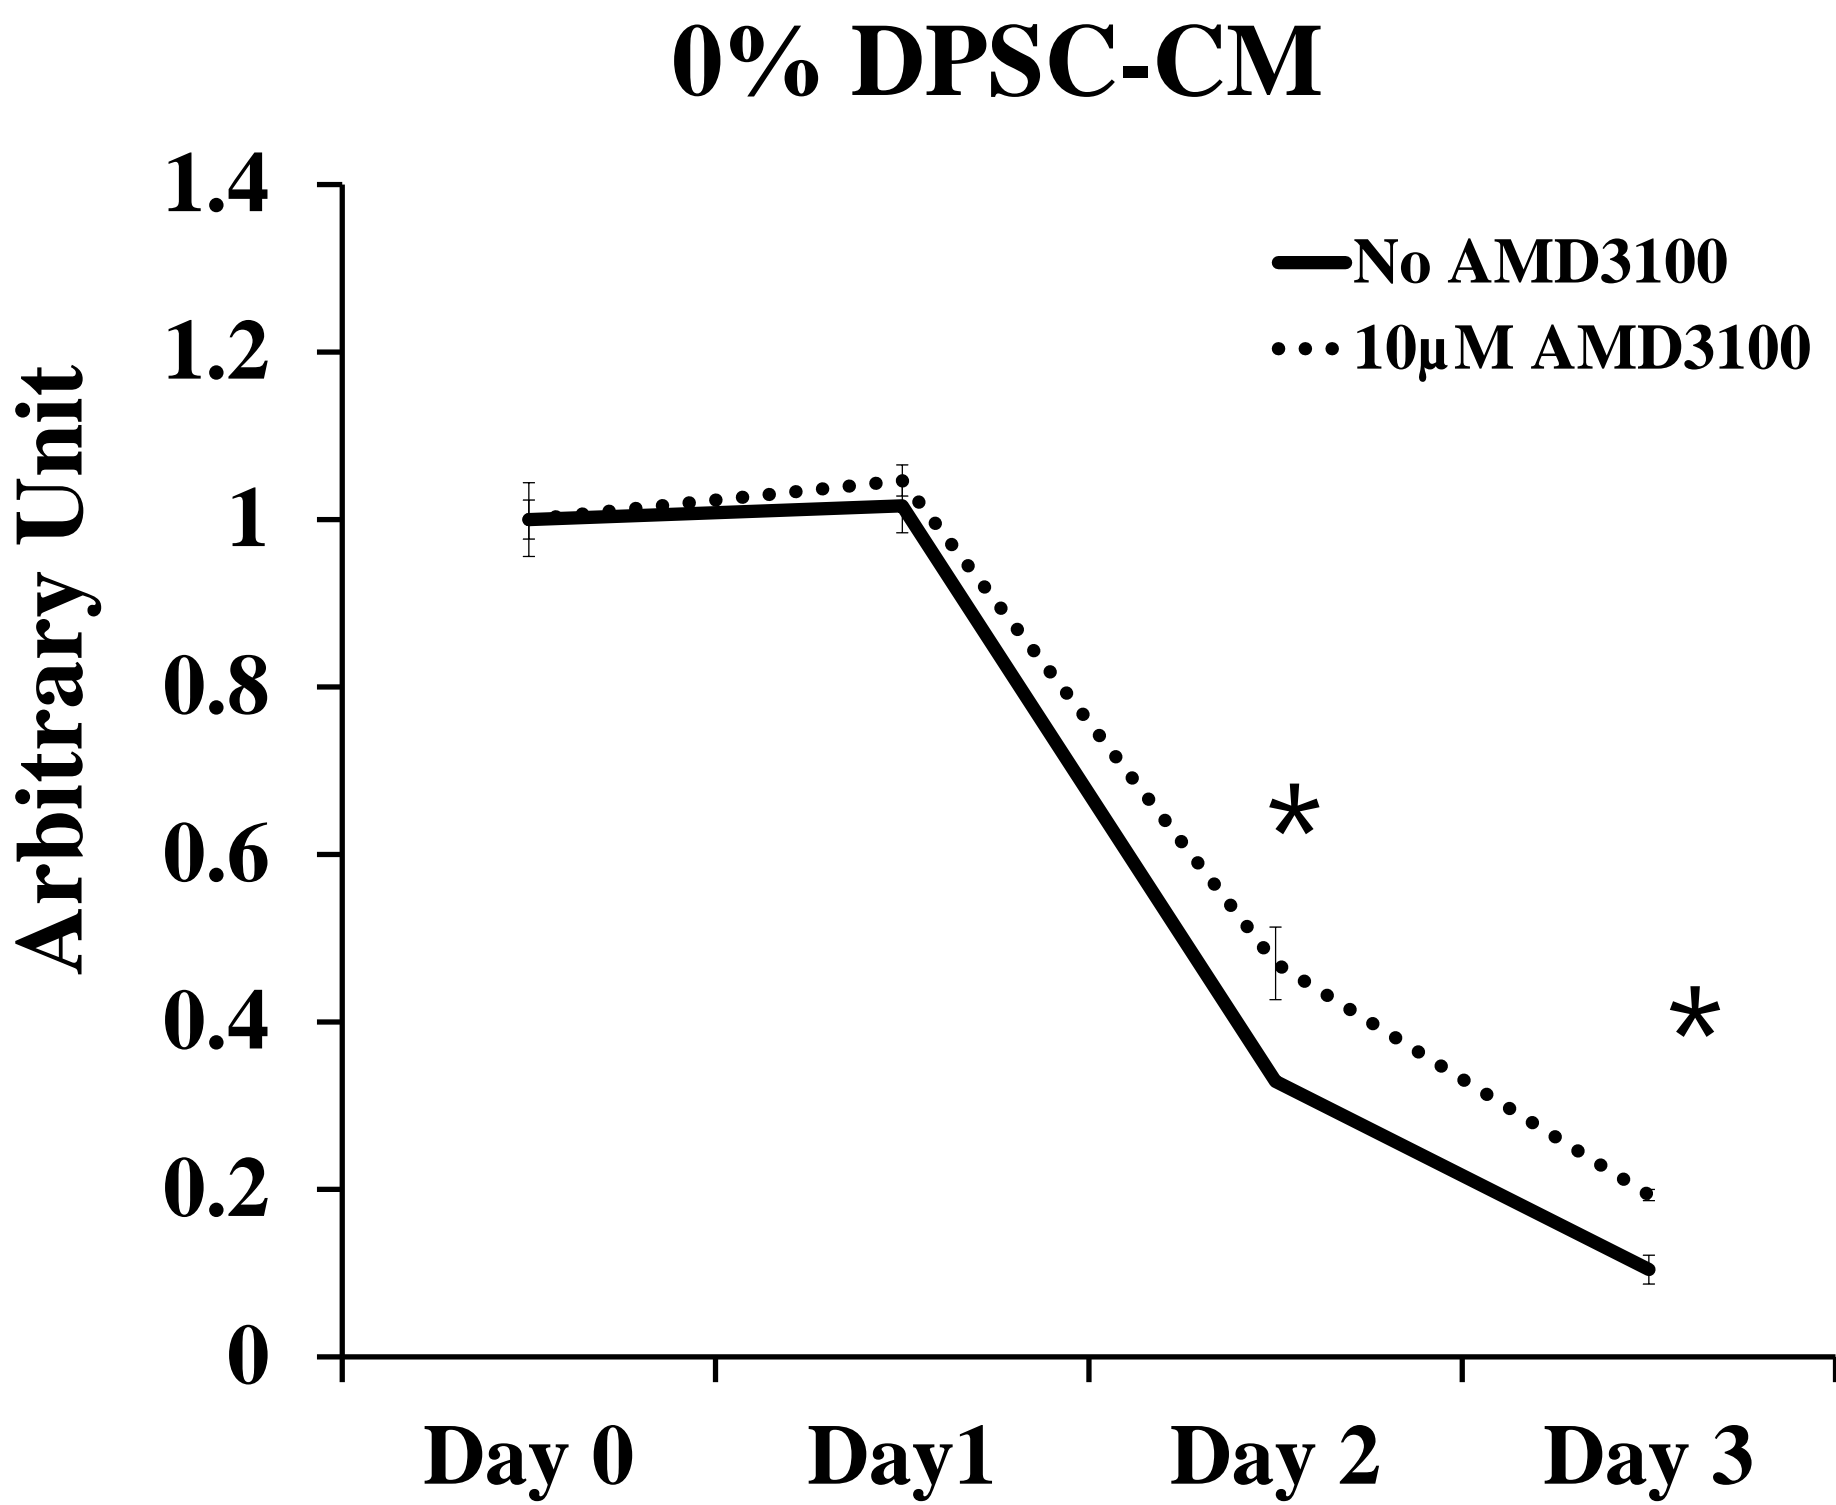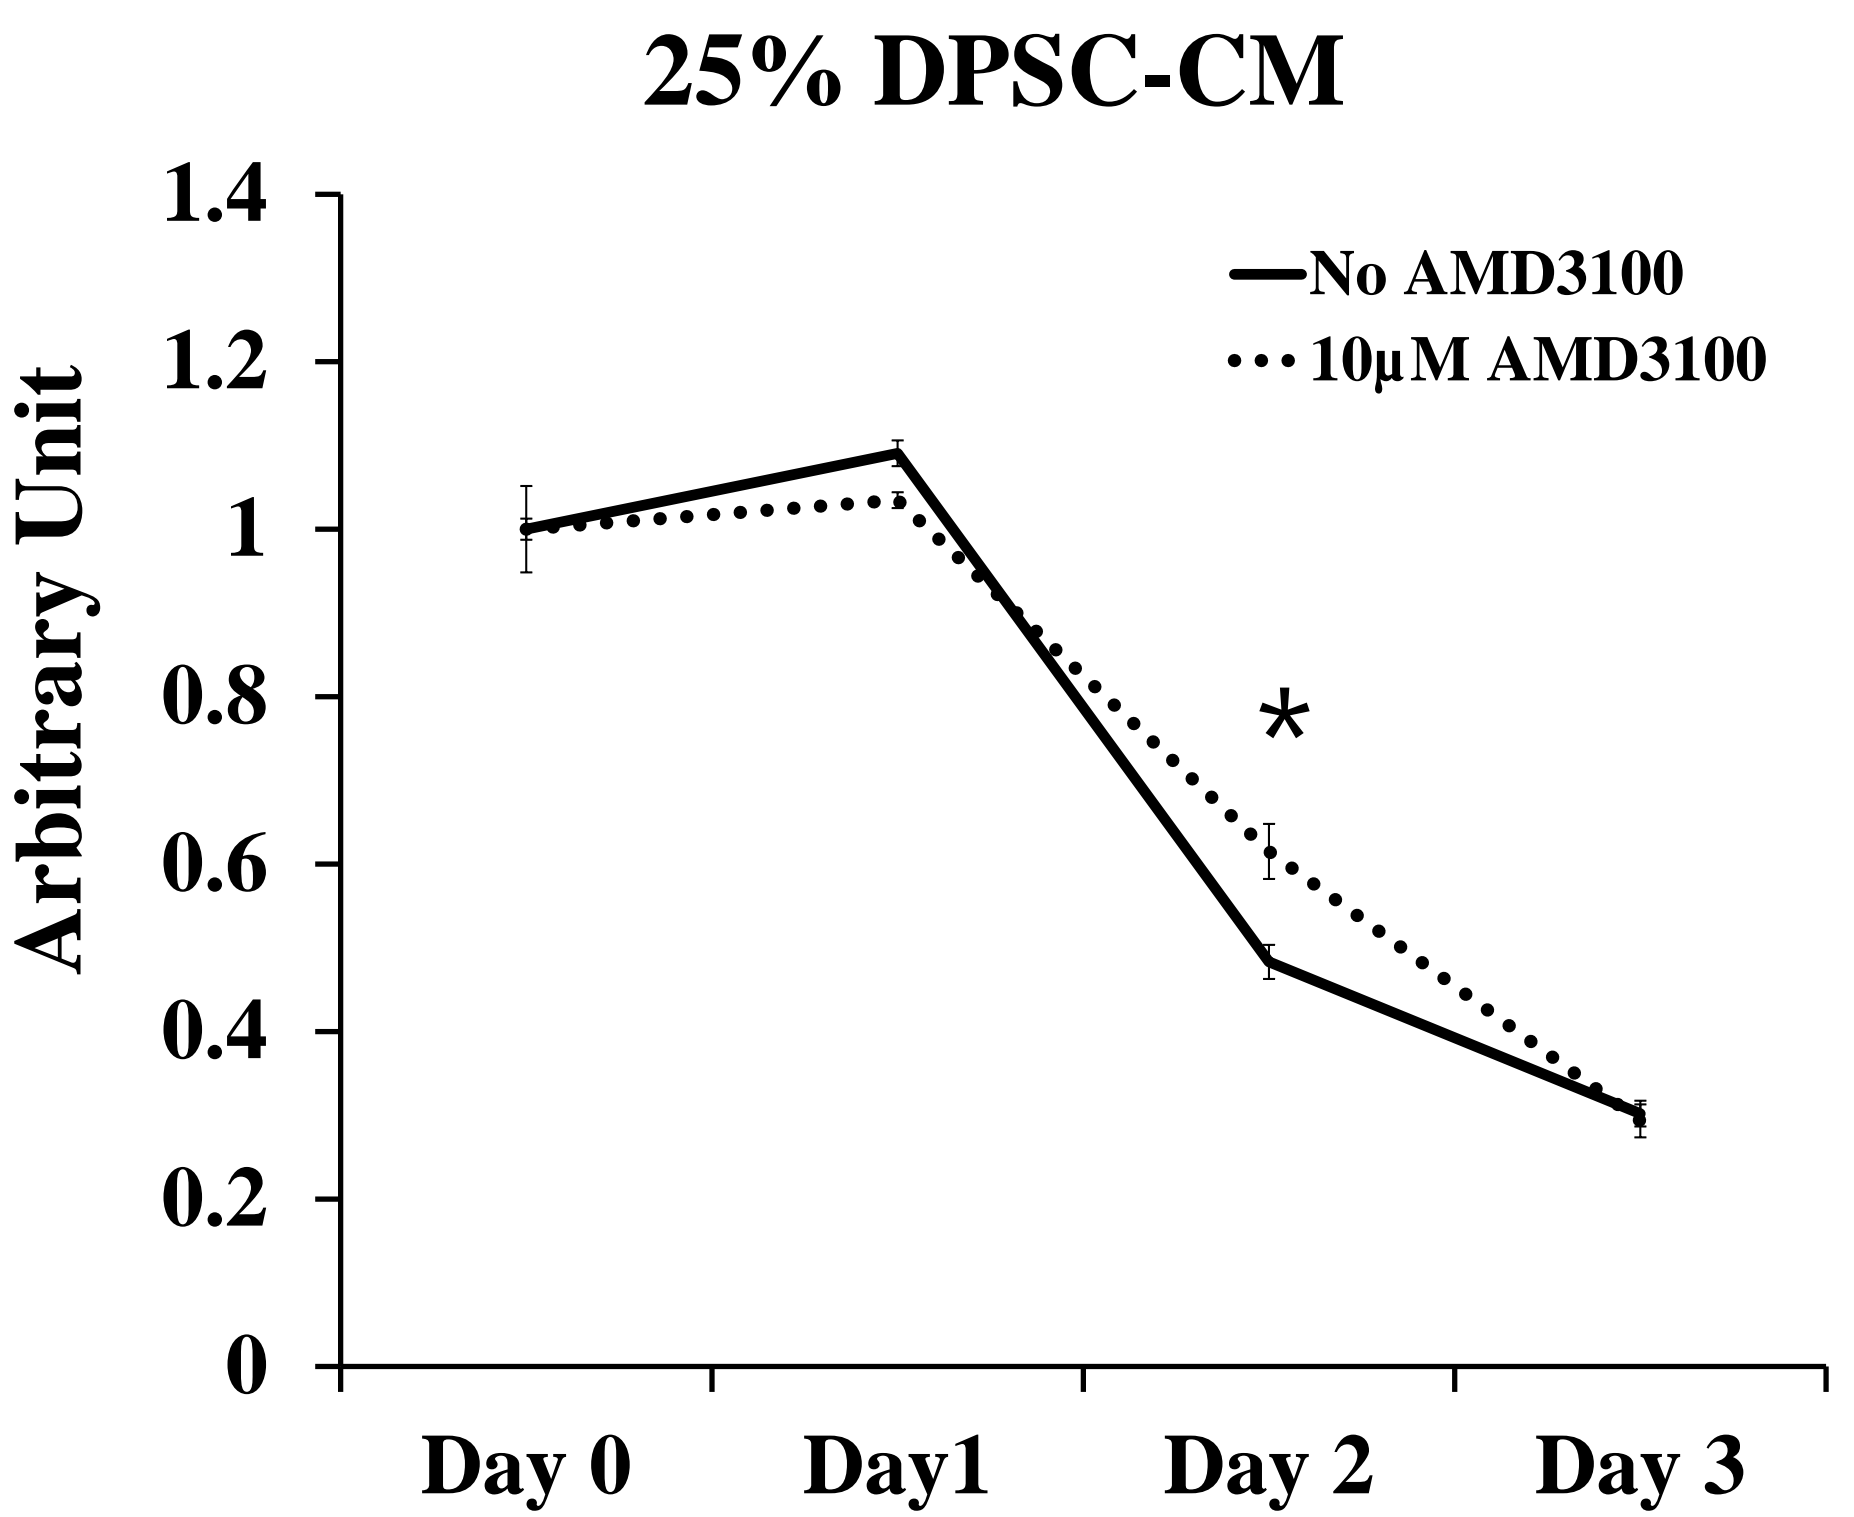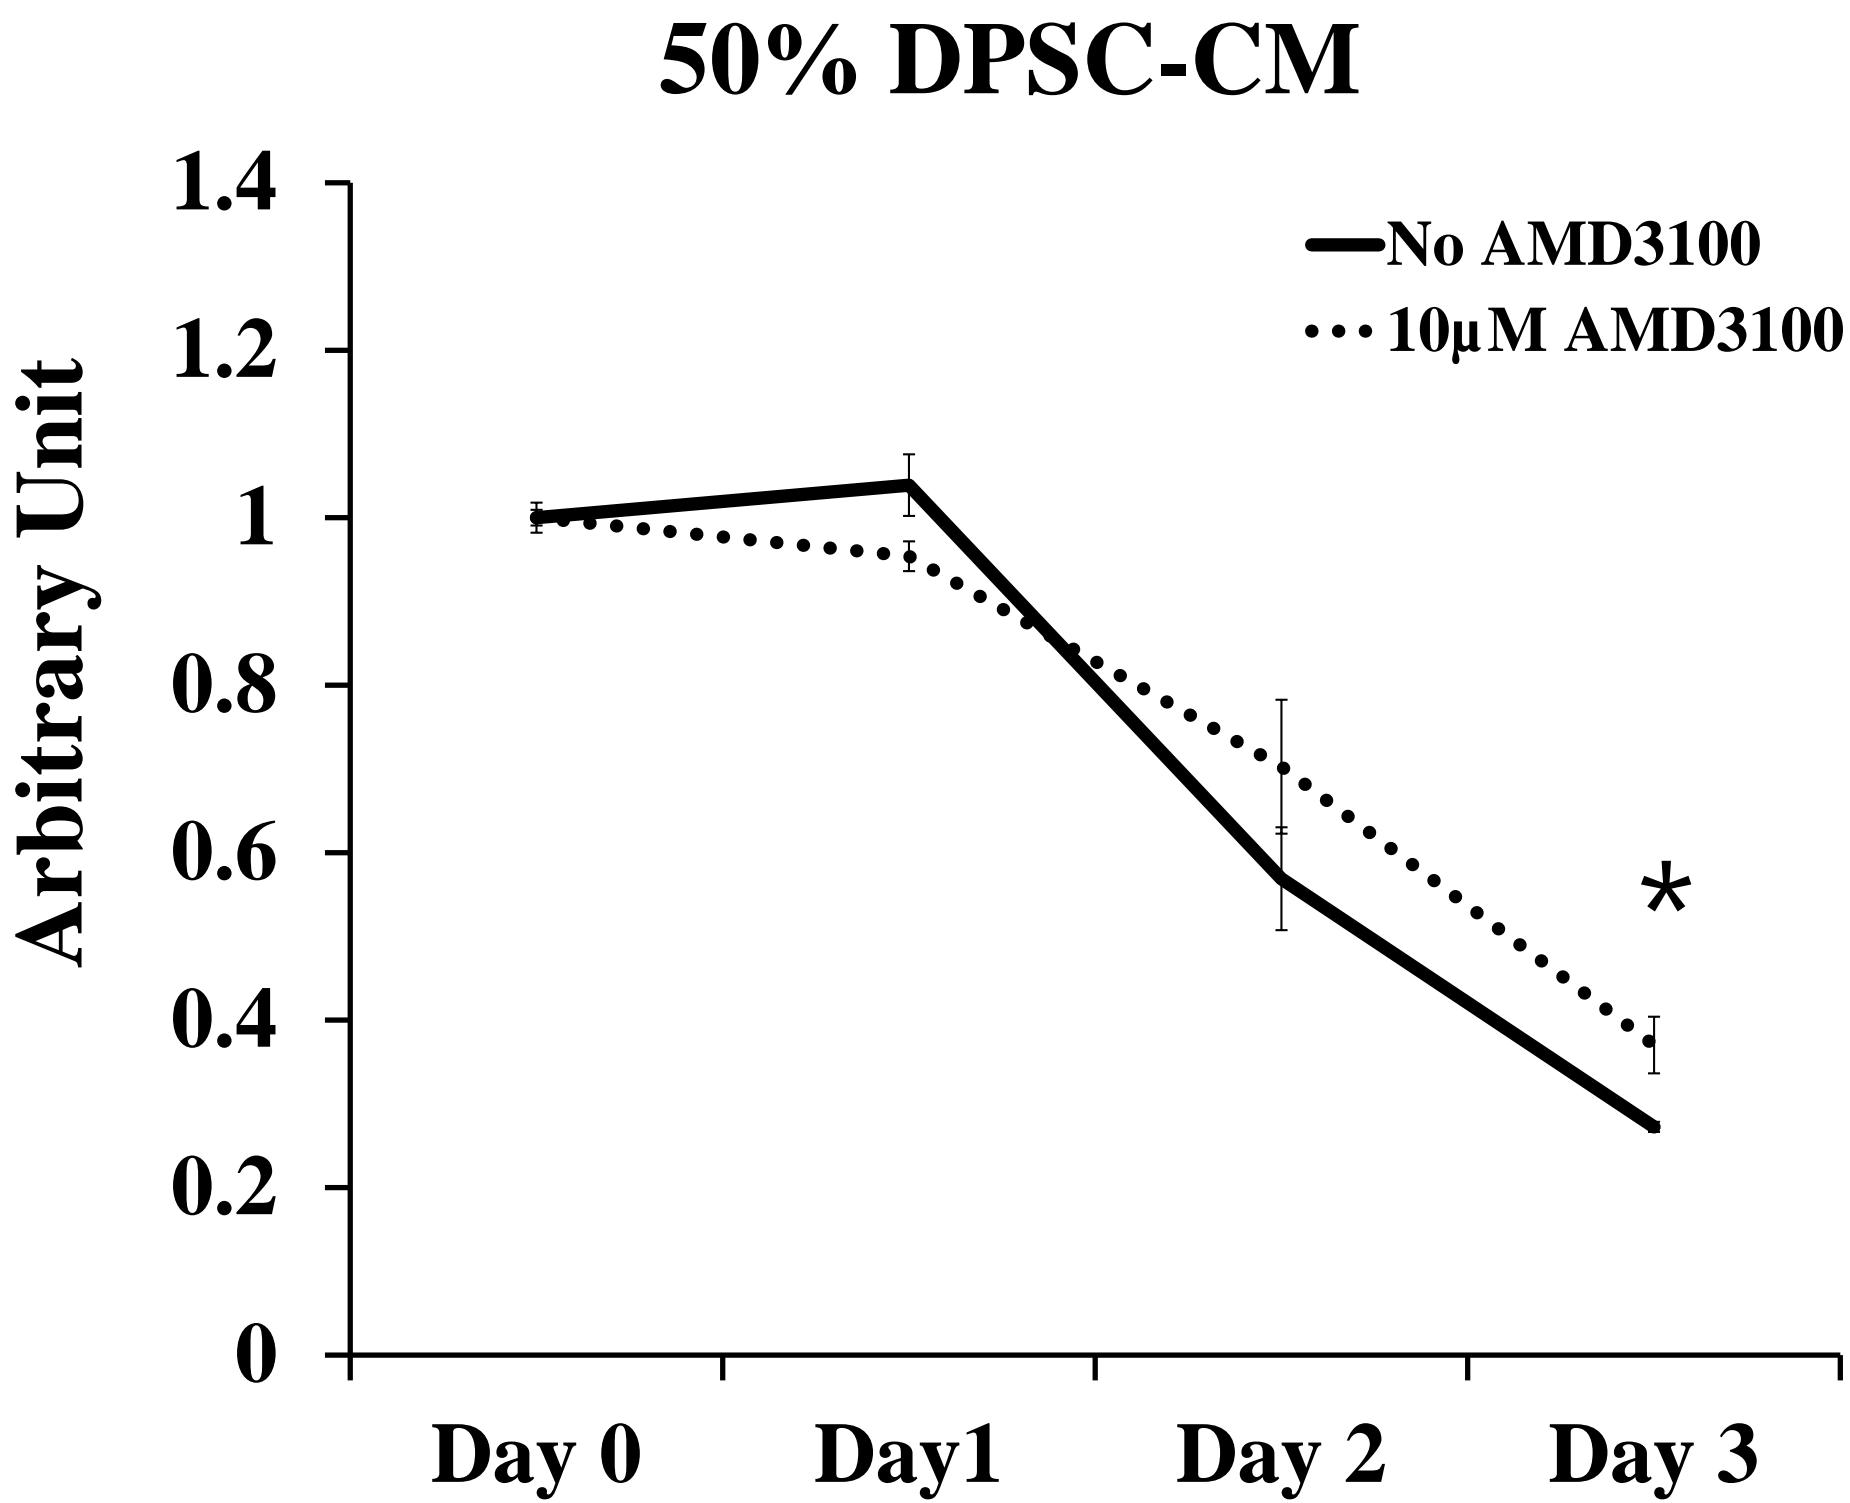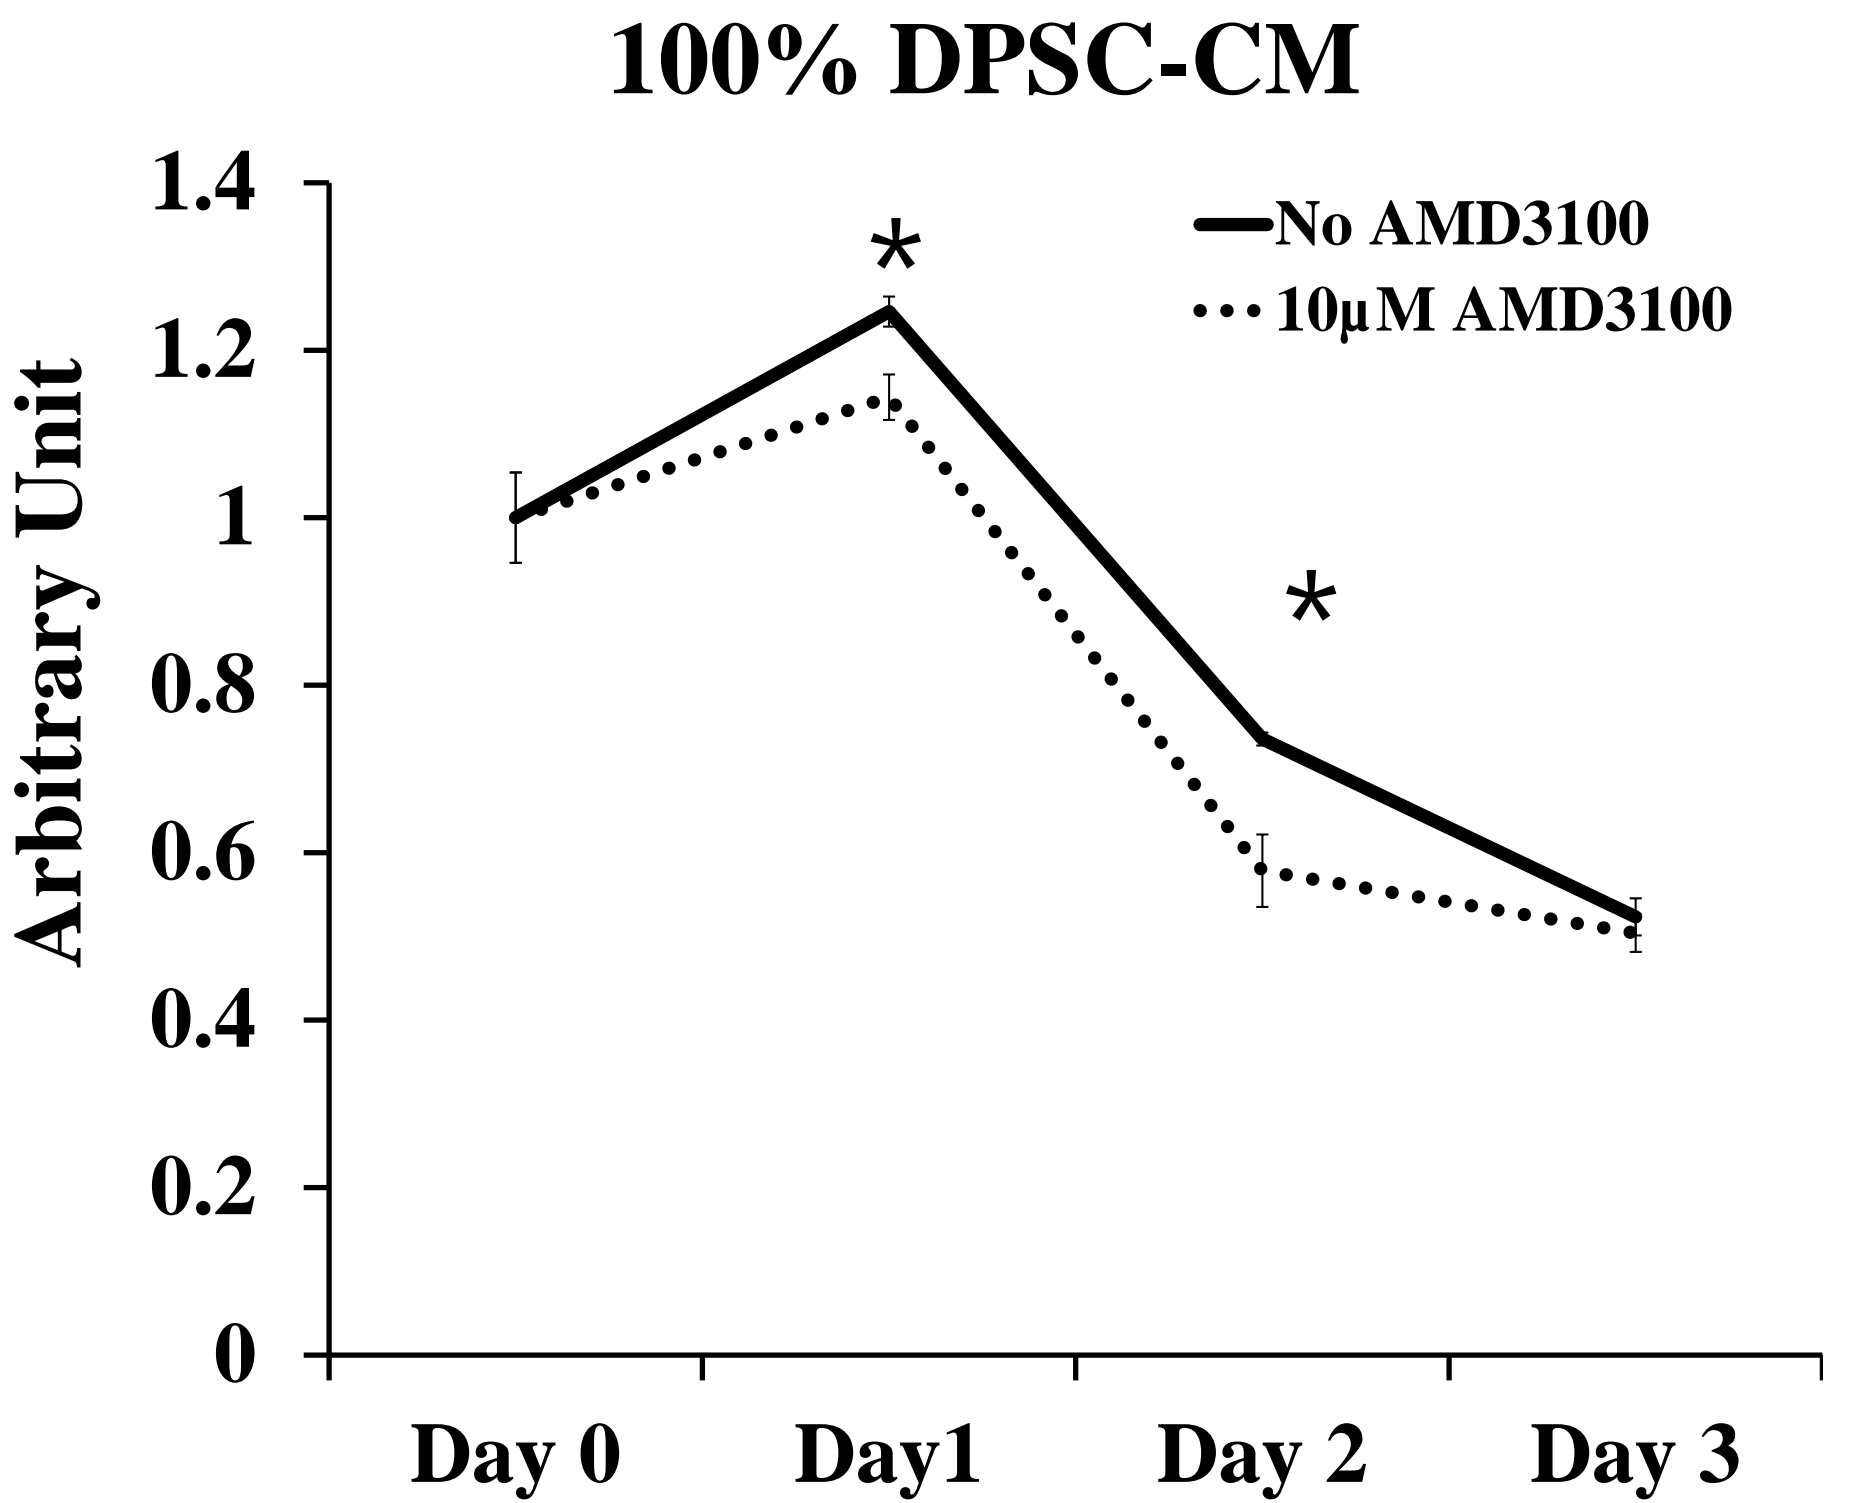

**Supplementary Table 1. Antibodies for FACS analysis**

| Antibodies                | Conjugation     | Company | Dilution |
|---------------------------|-----------------|---------|----------|
| CD14                      | FITC            | BD      | 1:100    |
| CD29                      | PE              | BD      | 1:100    |
| CD31                      | FITC            | BD      | 1:100    |
| CD34                      | APC             | BD      | 1:100    |
| CD44                      | APC             | BD      | 1:100    |
| CD45                      | FITC            | BD      | 1:100    |
| CD73                      | PE              | BD      | 1:100    |
| CD90                      | FITC            | BD      | 1:100    |
| CD117                     | PE              | BD      | 1:100    |
| HLA-I                     | FITC            | BD      | 1:100    |
| HLA-DR                    | APC             | BD      | 1:100    |
| Chondroitin Sulfate (NG2) | Alexa Fluor 488 | BD      | 1:100    |
| CD140b (PDGFR $\beta$ )   | PE              | BD      | 1:100    |
| CD146                     | Alexa Fluor 647 | BD      | 1:100    |

**Supplementary Table 2. Primers for qPCR**

| Genes                           | Size (bp) | 5' Oligonucleotide    | 3' Oligonucleotide     | T <sub>m</sub> (°C) |
|---------------------------------|-----------|-----------------------|------------------------|---------------------|
| <i>NG2</i>                      | 277       | ACTGGCTAGGGGTGTCAATG  | TCCTCAAGGTCCTGCTGAGT   | 60                  |
| <i><math>\alpha</math>-SMA</i>  | 256       | CCGGGAGAAAATGACTCAAA  | GAAGGAATAGCCACGCTCAG   | 60                  |
| <i>PDGFR<math>\beta</math></i>  | 286       | GACAGGGAGGTGGATTCTGA  | AGGTGTAGGTCCCCGAGTCT   | 60                  |
| <i>CD146</i>                    | 101       | ACTTCCACCTCCACCAGCTC  | GTCTGCGCCTTCTTGCTC     | 60                  |
| <i>PDGF-BB</i>                  | 105       | CTGGCATGCAAGTGTGAGAC  | AATGGTCACCCGAGTTTGG    | 63                  |
| <i>VEGF</i>                     | 136       | CACACAGGATGGCTTGAAGA  | AGGGCAGAATCATCACGAAG   | 63                  |
| <i>VEGFR1</i>                   | 110       | TCCCTTCCTTCAGTCATGTGT | AAGAAGGAAACAGAATCTGCAA | 60                  |
| <i>VEGFR2</i>                   | 121       | CGGCTCTTTCGCTTACTGTT  | TCTCTCTGCCTACCTCACCTG  | 60                  |
| <i>SDF-1<math>\alpha</math></i> | 108       | TTGACCCGAAGCTAAAGTGG  | TGGGCTCCTACTGTAAGGGTT  | 60                  |
| <i>CXCR4</i>                    | 145       | GGAGGGGATCAGTATATACA  | GAAGATGATGGAGTAGATGG   | 60                  |
| <i>GAPDH</i>                    | 208       | GATGCTGGCGCTGAGTACG   | GCTAAGCAGTTGGTGGTGC    | 60                  |
